# Supplementary material for: Gold and nickel alkyl substituted bis-thiophenedithiolene complexes: anionic and neutral forms
Source: Royal Society of Chemistry journal article supplement (doi:10.1039/c6qi00447d), 2016-11-29
Supplement: c6qi00447d1.pdf [file c6qi00447d1.pdf]

## Gold and nickel alkyl substituted bis-thiophenedithiolene complexes; anionic and neutral forms

Marta M. Andrade,<sup>[a]</sup> Rafaela A. L. Silva,<sup>[a]</sup> Isabel C. Santos,<sup>[a,b]</sup> Elsa B. Lopes,<sup>[a]</sup> Sandra Rabaça,<sup>[a]</sup> Laura C. J. Pereira,<sup>[a]</sup> Joana T. Coutinho,<sup>[a]</sup> João P. Telo,<sup>[b]</sup> Concepció Rovira,<sup>[c]</sup> Manuel Almeida<sup>[a]</sup> and Dulce Belo\*<sup>[a]</sup>

<sup>[a]</sup> C<sup>2</sup>TN, Centro de Ciências e Tecnologias Nucleares, Instituto Superior Técnico, Universidade de Lisboa, E.N. 10 ao km 139,7, 2695-066 Bobadela LRS, Portugal

<sup>[b]</sup> Centro de Química Estrutural, Instituto Superior Técnico, Universidade de Lisboa, P-1049-001 Lisboa, Portugal

<sup>[c]</sup> Institut de Ciència de Materials de Barcelona (ICMAB-CSIC) and CIBER-BBN, Campus UAB, E-08193 Bellaterra, Spain

### Electronic Supplementary Information (ESI)

Crystal structure of **III**:

Compound **III** was obtained as white needles and it crystallized in the orthorhombic system, space group  $P 2_1 2_1 2_1$ . The unit cell contains one neutral molecule at general position. The bond lengths are within the expected range for thiophenic dithiol ketones (Table S1, Figure S1). The crystal structure is similar to that found for the related compound **II** (R. A. L. Silva, B.J.C. Vieira, M. M. Andrade, I. C. Santos, S. Rabaça, D. Belo, M. Almeida, *Beilstein J. Org. Chem.* **2015**, *11*, 628–637). It is composed by layers, piled along *b*, of pairs of side-by-side chains of the ketone running parallel to *a*. Within these bi-chains, arranged in a herringbone type mode, the molecules are connected by short S $\cdots$ O contacts, with the isopropyl groups pointing outside the bi-chains. Molecules in different chains make an angle of circa 87.6°. There are no short contacts between bi-chains in the same layer. Molecules in different layers are connected by short S $\cdots$ C<sub>double bond</sub> contacts and S $\cdots$ H-C bond hydrogen bonds (Table S2, Figure S2).

**Table S1.** Bond lengths in the crystal structure of compound **III**.

|        | d (Å)    |
|--------|----------|
| S1-C1  | 1.782(3) |
| S1-C2  | 1.739(3) |
| S2-C2  | 1.708(3) |
| S2-C3  | 1.747(2) |
| S3-C1  | 1.779(3) |
| S3-C7  | 1.749(3) |
| O1-C1  | 1.208(3) |
| C2-C7  | 1.354(4) |
| C3-C4  | 1.509(4) |
| C3-C6  | 1.365(4) |
| C4-C5  | 1.527(4) |
| C4-C11 | 1.532(4) |
| C6-C7  | 1.435(3) |
| C6-C8  | 1.510(3) |
| C8-C9  | 1.532(4) |

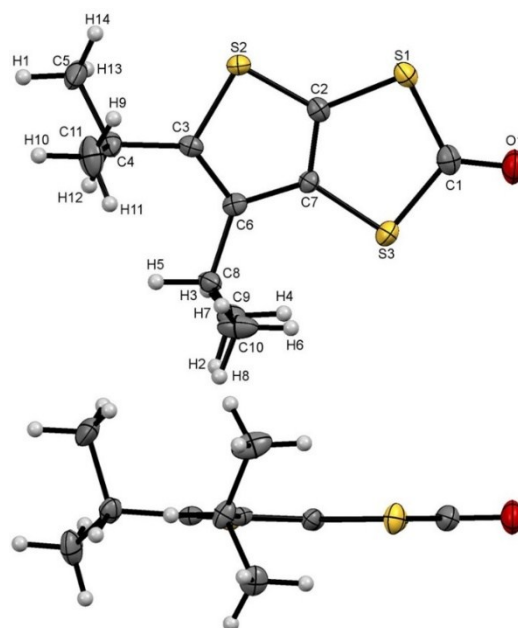

**Figure S1.** ORTEP and atomic numbering scheme of compound **III**, with thermal ellipsoids at 50% probability level.

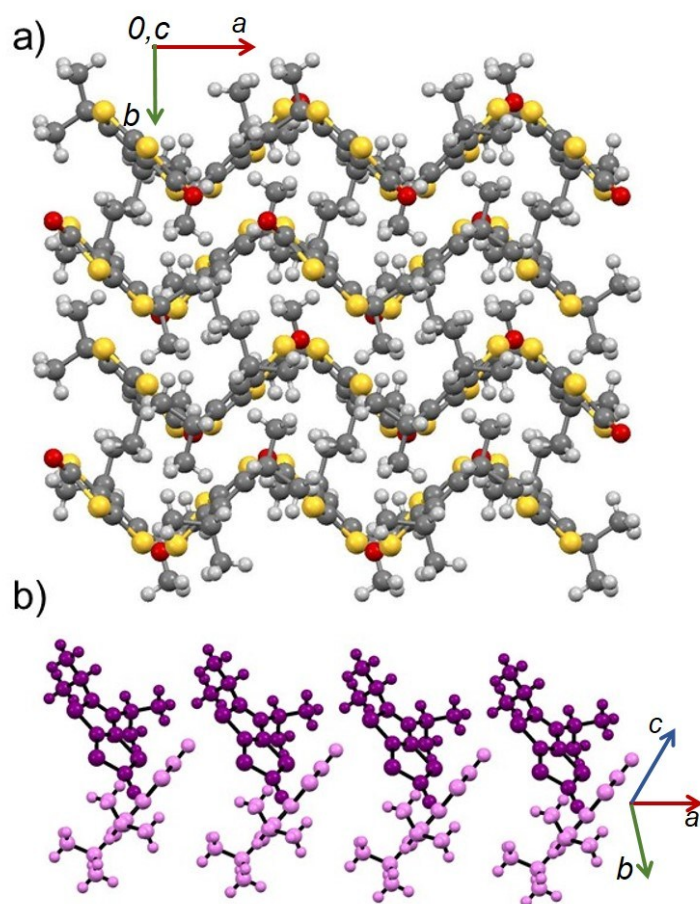

**Figure S2.** Crystal structure of III a) viewed along the *c* axis; b) detail showing the bi-chains, which constitute the layers.

**Table S2.** Short contacts and hydrogen bonds in the crystal structure of compound III.

|                                               | d (Å) | Symm. Opp.           | angle (°) |
|-----------------------------------------------|-------|----------------------|-----------|
| S1 $\cdots$ O1                                | 3.155 | $-1/2+x, 1.5-y, -z$  |           |
| S1 $\cdots$ H1-C5                             | 3.097 | $1.5-x, 1-y, -1/2+z$ | 119.4     |
| S2 $\cdots$ O1                                | 3.311 | $-1/2+x, 1.5-y, -z$  |           |
| S2 $\cdots$ H7-C10                            | 3.061 | $1-x, -1/2+y, 1/2-z$ | 167.3     |
| S3 $\cdots$ H3-C5                             | 3.087 | $2-x, 1/2+y, 1/2-z$  | 140.9     |
| S3 $\cdots$ H13-C5                            | 3.099 | $2-x, 1/2+y, 1/2-z$  | 139.2     |
| S3 $\cdots$ C3=C6 <sub>(double bond)</sub>    | 3.433 | $2-x, 1/2+y, 1/2-z$  |           |
| C2=C7 <sub>(double bond)</sub> $\cdots$ H1-C5 | 2.899 | $1-x, -1/2+y, 1/2-z$ | 119.5     |

**Table S3.** Bond lengths in the crystal structure of compound **1**.

|        | d (Å)    |
|--------|----------|
| Au1-S1 | 2.3113   |
| Au1-S2 | 2.315    |
| S1-C2  | 1.754(4) |
| S2-C1  | 1.748(3) |
| C1-C2  | 1.347(5) |
| C1-S3  | 1.764(4) |
| C2-C3  | 1.420(7) |
| C4-C5  | 1.507(4) |
| C4-S3  | 1.749(3) |
| C4-C3  | 1.356(8) |
| C5-C6  | 1.544(5) |
| C5-C7  | 1.532(5) |
| C5-C8  | 1.528(5) |

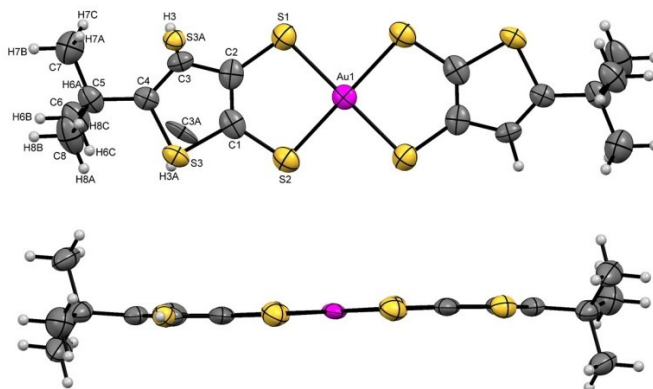

**Figure S3.** ORTEP and atomic numbering scheme of compound **1**, with thermal ellipsoids at 50% probability level.

**Table S4.** Short contacts and hydrogen bonds in the crystal structure of compound **1**.

|            | d (Å) | Symm. Opp.     | angle (°) | Interaction    |
|------------|-------|----------------|-----------|----------------|
| S3-S3      | 3.413 | 1/2-x,1/2-y,-z |           | Anionic Chain  |
| C6-H6C-S2  | 3.036 | 1/2-x,1/2-y,-z | 139.8     | Anionic Chain  |
| C22-H22-S1 | 2.963 | x,y,z          | 154.5     | Anionic Cation |
| C21-H21-S2 | 3.054 | x,y,z          | 126.7     | Anionic Cation |

**Table S5.** Bond lengths in the crystal structure of Compound **2**.

|        | d (Å)    |
|--------|----------|
| Ni1-S1 | 2.1566   |
| Ni1-S2 | 2.1613   |
| S1-C2  | 1.735(2) |
| S2-C1  | 1.723(2) |
| C1-C2  | 1.362(3) |
| C1-S3  | 1.752(3) |
| C2-C3  | 1.419(5) |
| C4-C5  | 1.512(3) |
| C4-S3  | 1.745(2) |
| C4-C3  | 1.358(7) |
| C5-C6  | 1.526(4) |
| C5-C7  | 1.539(3) |
| C5-C8  | 1.533(4) |

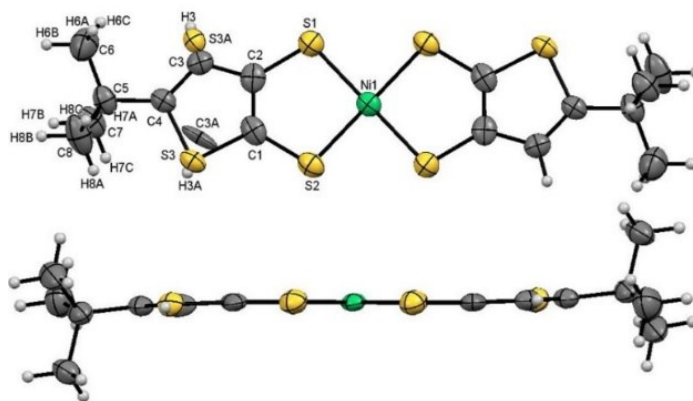

**Figure S4.** ORTEP and atomic numbering scheme of compound **2**, with thermal ellipsoids at 50% probability level.

**Table S6.** Short contacts and hydrogen bonds in the crystal structure of Compound **2**.

|              | d (Å) | Symm. Opp.     | angle (°) | Interaction   |
|--------------|-------|----------------|-----------|---------------|
| S3-S3        | 3.446 | 1/2-x,1/2-y,-z |           | Anionic Chain |
| S1···H22-C22 | 2.954 | x,y,z          | 152.2     | Anion-Cation  |
| S2···H21-C21 | 3.078 | x,y,z          | 124.3     | Anion-Cation  |

**Table S7.** Bond lengths in the crystal structure of compound **3**, molecule A.

|        | d (Å)    |
|--------|----------|
| Au1-S1 | 2.301    |
| Au1-S2 | 2.305    |
| S1-C1  | 1.740(5) |
| S2-C2  | 1.768(5) |
| S3-C1  | 1.728(5) |
| S3-C4  | 1.726(6) |
| C1-C2  | 1.345(7) |
| C2-C3  | 1.431(7) |
| C3-C4  | 1.344(9) |

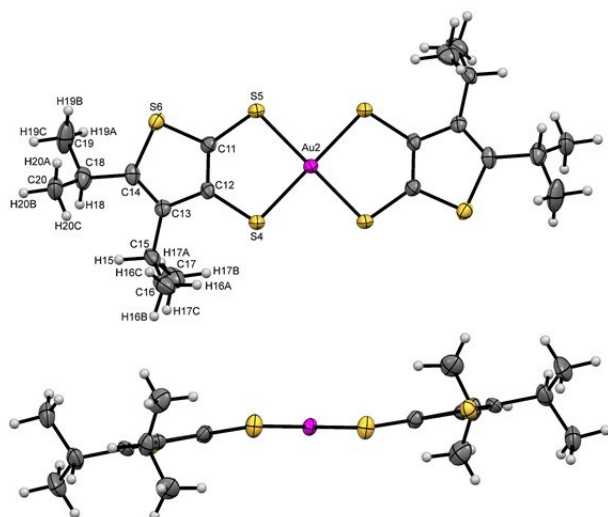

**Figure S5.** ORTEP and atomic numbering scheme of in compound **3**, with thermal ellipsoids at 50% probability

|        |          |
|--------|----------|
| C3-C5  | 1.506(7) |
| C4-C8  | 1.521(9) |
| C5-C6  | 1.53(1)  |
| C5-C7  | 1.523(9) |
| C8-C9  | 1.55(1)  |
| C8-C10 | 1.51(1)  |

**Table S8.** Bond lengths in the crystal structure of compound **3**, molecule B.

|         | d (Å)    |
|---------|----------|
| Au2-S4  | 2.313    |
| Au2-S5  | 2.305    |
| S4-C12  | 1.759(5) |
| S5-C11  | 1.761(5) |
| S6-C11  | 1.712(5) |
| S6-C14  | 1.742(6) |
| C11-C12 | 1.360(7) |
| C12-C13 | 1.450(7) |
| C13-C14 | 1.360(7) |
| C13-C15 | 1.500(8) |
| C14-C18 | 1.498(8) |
| C15-C16 | 1.532(7) |
| C15-C17 | 1.539(8) |
| C18-C19 | 1.515(9) |
| C18-C20 | 1.523(8) |

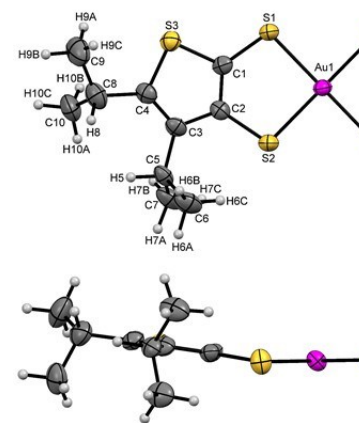

complexes level.

**Table S9.** Short contacts and hydrogen bonds in the crystal structure of compound **3**.

|              | d (Å) | Symm. Opp. | angle (°) | Interaction  |
|--------------|-------|------------|-----------|--------------|
| S3-S5        | 3.677 | -x,1-y,1-z | -         | Anion-Anion  |
| S3-S6        | 3.681 | -x,1-y,1-z | -         | Anion-Anion  |
| C45...H45-S2 | 2.875 | 1-x,-y,1-z | 164.4     | Cation-Anion |

|                                    |       |             |       |              |
|------------------------------------|-------|-------------|-------|--------------|
| C25-H25-S2                         | 2.956 | x,y,z       | 142.8 | Cation-Anion |
| S3-H55-C55                         | 3.096 | x,y,z       | 115.7 | Cation-Anion |
| S4-H33-C33                         | 3.011 | -1+x,y,-1+z | 148.4 | Cation-Anion |
| S6-H23-C23                         | 3.014 | -1+x,y,-1+z | 138.3 | Cation-Anion |
| S6-H44-C44                         | 3.042 | x,1+y,-1+z  | 139.6 | Cation-Anion |
| C54-H54-S4                         | 2.874 | x,y,1+z     | 152.3 | Cation-Anion |
| C33-H33-C11 <sub>double bond</sub> | 2.765 | 1+x,y,1+z   | 150.1 | Cation-Anion |
| C33-H33-C12 <sub>double bond</sub> | 2.690 | 1+x,y,1+z   | 176   | Cation-Anion |

**Table S10.** Bond lengths in the crystal structure of compound **4**, molecule A.

|        | d (Å)    |
|--------|----------|
| Ni1-S1 | 2.1548   |
| Ni1-S2 | 2.1630   |
| S1-C1  | 1.722(2) |
| S3-C1  | 1.724(2) |
| S3-C4  | 1.747(2) |
| S2-C2  | 1.739(2) |
| C1-C2  | 1.373(3) |
| C4-C8  | 1.516(3) |
| C4-C3  | 1.362(3) |
| C8-C9  | 1.540(3) |
| C8-C10 | 1.529(3) |
| C3-C5  | 1.515(3) |
| C3-C2  | 1.444(3) |
| C5-C7  | 1.530(3) |
| C5-C6  | 1.520(3) |

**Table S11.** Bond lengths in the crystal structure of Compound **4**, molecule B.

|         | d (Å)    |
|---------|----------|
| Ni2-S4  | 2.1588   |
| Ni2-S5  | 2.1584   |
| S4-C12  | 1.741(2) |
| S5-C11  | 1.719(2) |
| S6-C11  | 1.730(2) |
| S6-C14  | 1.747(2) |
| C12-C11 | 1.375(3) |
| C12-C13 | 1.442(3) |
| C14-C18 | 1.516(3) |
| C14-C13 | 1.366(3) |
| C18-C19 | 1.518(4) |
| C18-C20 | 1.529(3) |
| C13-C15 | 1.508(3) |
| C15-C17 | 1.534(3) |
| C15-C16 | 1.521(3) |

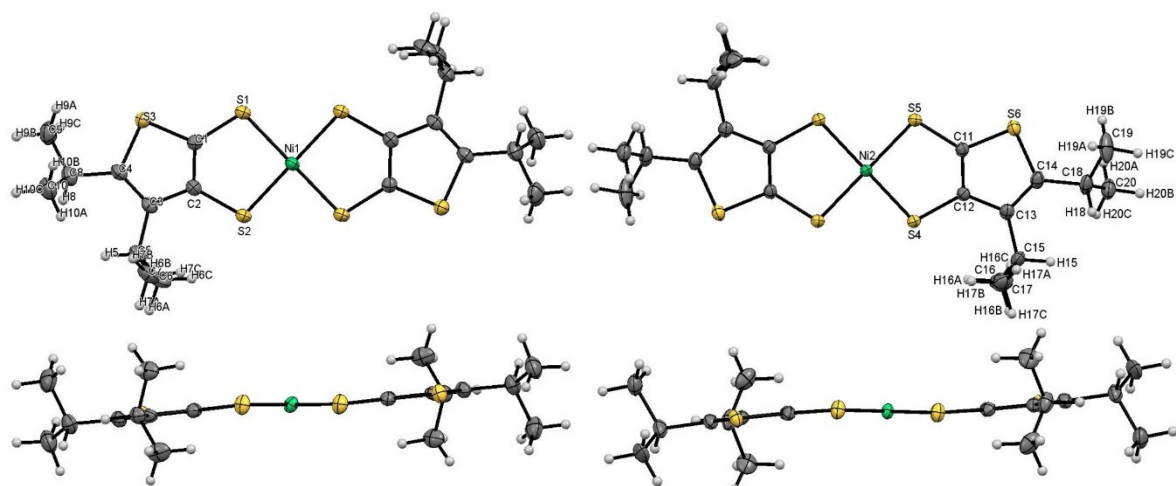

**Figure S6.** ORTEP and atomic numbering scheme of complexes in compound **4**, with thermal ellipsoids at 50% probability level.

**Table S12.** Short contacts and hydrogen bonds in the crystal structure of compound **4**.

|             | d (Å) | Symm. Opp.  | angle (°) | Interaction  |
|-------------|-------|-------------|-----------|--------------|
| S3-S6       | 3.642 | -x,1-y,1-z  | -         | Anion-Anion  |
| S2-H25-C25  | 2.892 | x,y,z       | 142.9     | Anion-Cation |
| S2-H45-C45  | 2.936 | x,1+y,z     | 161.3     | Anion-Cation |
| S4-H33-C33  | 2.931 | -1+x,y,-1+z | 149.7     | Anion-Cation |
| S4-H54-C54  | 2.905 | x,y,-1+z    | 151.5     | Anion-Cation |
| S6-H23-C23  | 2.989 | -1+x,y,-1+z | 140.79    | Anion-Cation |
| C11=C12-H33 | 2.782 | -1+x,y,-1+z | 173.2     | Anion-Cation |
| C11=C12-H23 | 2.772 | -1+x,y,-1+z | 126.2     | Anion-Cation |



**Table S13.** Bond lengths in the crystal structure of compound **5**.

|         | d (Å)    |
|---------|----------|
| Au1-S1  | 2.320(1) |
| Au1-S2  | 2.321(1) |
| Au1-S3  | 2.294(1) |
| Au1-S4  | 2.299(1) |
| S1-C1   | 1.714(6) |
| S2-C2   | 1.690(5) |
| S3-C9   | 1.745(6) |
| S4-C10  | 1.739(6) |
| S5-C2   | 1.751(6) |
| S5-C4   | 1.710(6) |
| C3-C1   | 1.39(2)  |
| C3-C4   | 1.40(1)  |
| S6-C10  | 1.749(7) |
| S6-C12  | 1.691(7) |
| C11-C9  | 1.46(2)  |
| C11-C12 | 1.36(2)  |
| C1-C2   | 1.397(7) |
| C4-C5   | 1.507(8) |
| C5-C6   | 1.53(1)  |
| C5-C7   | 1.530(9) |
| C5-C8   | 1.537(8) |
| C9-C10  | 1.349(7) |
| C12-C13 | 1.520(9) |
| C13-C14 | 1.63(1)  |
| C13-C15 | 1.55(1)  |
| C13-C16 | 1.43(1)  |

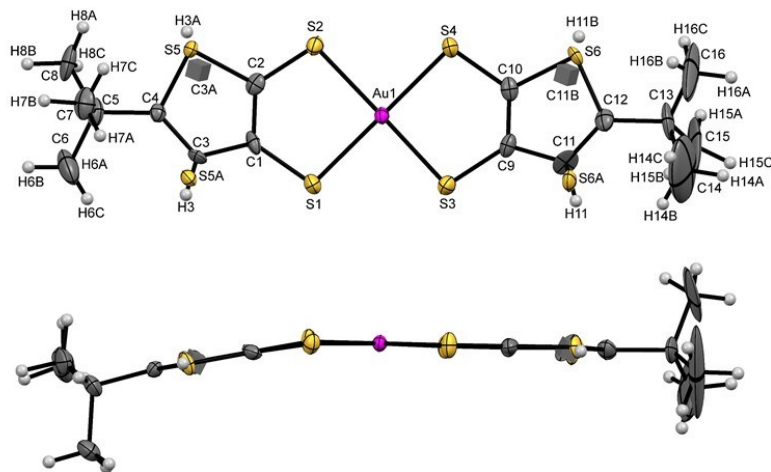

**Figure S7.** ORTEP and atomic numbering scheme of compound **5**, with thermal ellipsoids at 50% probability level.

**Table S14.** Short contacts and hydrogen bonds in the crystal structure of compound **5**.

|            | d (Å) | Symm. Opp.         | angle (°) | Interaction |
|------------|-------|--------------------|-----------|-------------|
| S2-S1      | 3.499 | 1+x,y,z            | -         | dimer       |
| S4-S1      | 3.552 | -1+x,y,z           | -         | intrachains |
| S4-S3      | 3.534 | -1+x,y,z           | -         | intrachains |
| S2-S2      | 3.517 | -x,2-y,-z          | -         | intrachains |
| S2-S4      | 3.419 | -x,2-y,-z          | -         | intrachains |
| S6-H6A-C6  | 2.921 | 1-x,2-y,-z         | 173.7     | dimer       |
| C11-H8c-C8 | 2.855 | 1-x,2-y,-z         | 170.3     | dimer       |
| S6-H7b-C7  | 2.981 | -1/2+x,1.5-y,1/2+z | 143.6     | interchains |

**Table S15.** Bond lengths in the crystal structure of compound **6**.

|         | d (Å)    |
|---------|----------|
| Ni1-S1  | 2.144(1) |
| Ni1-S2  | 2.144(1) |
| Ni1-S4  | 2.146(1) |
| Ni1-S5  | 2.145(1) |
| S1-C1   | 1.694(4) |
| S2-C2   | 1.689(3) |
| S4-C9   | 1.706(4) |
| S5-C10  | 1.699(4) |
| S6-C10  | 1.765(4) |
| S6-C12  | 1.768(4) |
| C11-C9  | 1.42(1)  |
| C11-C12 | 1.35(1)  |
| C1-C2   | 1.398(5) |
| C1-S3   | 1.731(5) |
| C2-C3   | 1.43(1)  |
| C4-C5   | 1.518(4) |
| C4-S3   | 1.730(5) |
| C4-C3   | 1.36(1)  |
| C5-C6   | 1.544(4) |
| C5-C7   | 1.528(5) |
| C5-C8   | 1.521(5) |
| C9-C10  | 1.377(5) |
| C12-C13 | 1.506(5) |
| C13-C14 | 1.514(5) |
| C13-C15 | 1.518(6) |
| C13-C16 | 1.515(7) |

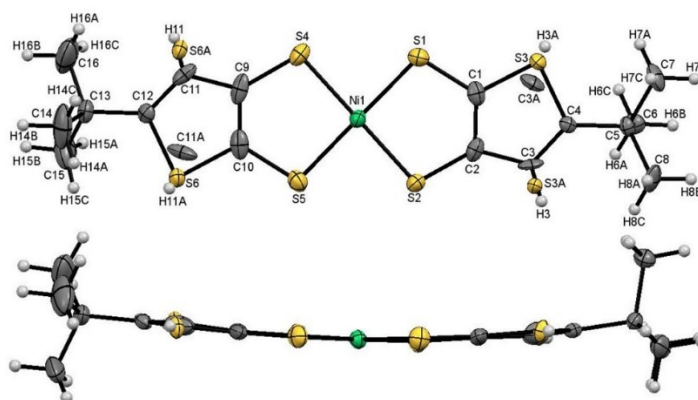

**Figure S8.** ORTEP and atomic numbering scheme of compound **6**, with thermal ellipsoids at 50% probability level.

**Table S16.** Short contacts and hydrogen bonds in the crystal structure of compound **6**.

|             | d (Å) | Symm. Opp.          | angle (°) | Interaction      |
|-------------|-------|---------------------|-----------|------------------|
| S3–S3       | 3.443 | 1-x,-y,-z           |           | within the layer |
| S2–S2       | 3.682 | -x,-y,1-z           |           | within the layer |
| S6–H7C–C7   | 2.937 | -x,-y,1-z           | 164.5     | within the dimer |
| C10=C9–H14B | 2.764 | -1/2+x,1/2-y,-1/2+z | 163.9     | between layers   |

**Table S17.** Bond lengths in the crystal structure of Compound **7**.

|        | d (Å)    |
|--------|----------|
| Au1-S1 | 2.309    |
| Au1-S2 | 2.296    |
| S1-C2  | 1.730(5) |
| S2-C1  | 1.715(5) |
| S3-C1  | 1.719(5) |
| S3-C4  | 1.746(5) |
| C1-C2  | 1.394(7) |
| C2-C3  | 1.442(6) |
| C3-C4  | 1.363(7) |
| C3-C5  | 1.515(7) |
| C4-C6  | 1.519(6) |
| C5-C7  | 1.521(8) |
| C5-C8  | 1.535(7) |
| C5-H5  | 0.90(4)  |
| C6-C9  | 1.518(8) |
| C6-C10 | 1.523(8) |

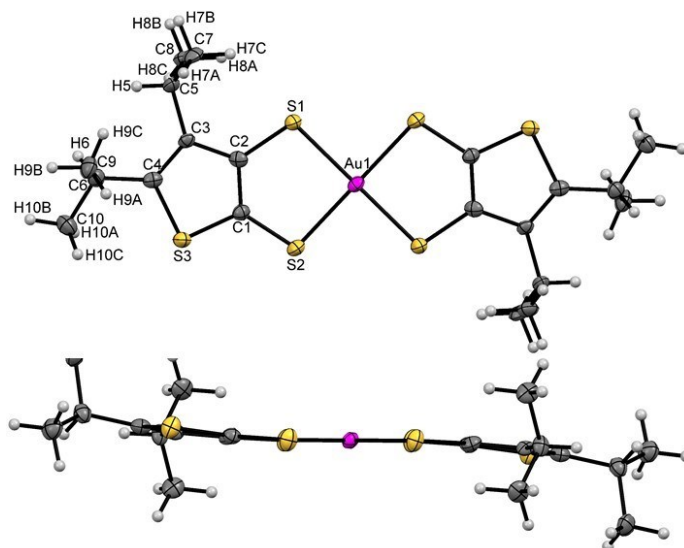**Figure S9.** ORTEP and atomic numbering scheme of compound **7**, with thermal ellipsoids at 50% probability level.**Table S18.** Short contacts and hydrogen bonds in the crystal structure of compound **7**.

|            | d (Å) | Symm. Opp. | angle (°) | Interaction |
|------------|-------|------------|-----------|-------------|
| C1=C2–H10A | 2.803 | -1+x,y,z   | 168.2     | column      |

**Table S19.** Bond lengths in the crystal structure of compound **8**.

|          | d (Å)    |
|----------|----------|
| Ni1-S1   | 2.1468   |
| Ni1-S2   | 2.1382   |
| S1-C2    | 1.712(2) |
| S2-C1    | 1.695(2) |
| S3-C1    | 1.723(2) |
| S3-C4    | 1.746(2) |
| C1-C2    | 1.396(3) |
| C2-C3    | 1.447(3) |
| C3-C4    | 1.364(3) |
| C3-C5    | 1.509(3) |
| C4-C6    | 1.516(3) |
| C5-H5    | 1.000    |
| C5-C7    | 1.536(3) |
| C5-C8    | 1.533(4) |
| C6-H6    | 1.000    |
| C6-C10   | 1.525(3) |
| C6-C9    | 1.518(4) |
| C7-H7A   | 0.980    |
| C7-H7C   | 0.979    |
| C7-H7B   | 0.980    |
| C10-H10B | 0.980    |
| C10-H10A | 0.980    |
| C10-H10C | 0.980    |
| C8-H8B   | 0.980    |
| C8-H8A   | 0.980    |
| C8-H8C   | 0.980    |
| C9-H9B   | 0.981    |
| C9-H9C   | 0.980    |
| C9-H9A   | 0.980    |

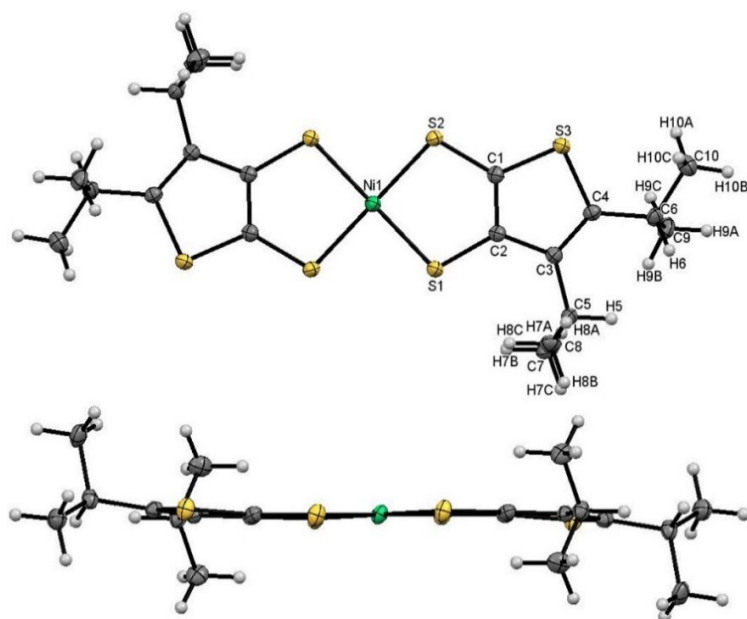

**Figure S10:** ORTEP and atomic numbering scheme of compound **8**, with thermal ellipsoids at 50% probability level.

**Table S20.** Short contacts and hydrogen bonds in the crystal structure of compound **8**.

|            | d (Å) | Symm. Opp. | angle (°) | Interaction |
|------------|-------|------------|-----------|-------------|
| C1=C2-H10c | 2.805 | -1+x,y,z   | 172       | column      |

**UV-Vis Spectroscopy of the Ni and Au complexes (1-8):**

In the nickel complexes **6** and **8**, it is observed a strong absorption band at the lower energy region, at ~850 nm, typical of neutral nickel complexes. This intense band is usually attributed to the  $\pi$ - $\pi^*$  transition between the frontier orbitals: the highest occupied molecular orbital (HOMO) and the lowest unoccupied molecular orbital (LUMO). In the case of the corresponding monoanionic complexes, **2** and **4**, this band should appear shifted to lower energies, above the upper limit of the spectra, with decrease intensity. In the electronic absorption spectra of **2** and **4**, a slight increase of the slope in the upper limit of the spectra is observed, indicative of the formation of this band.

The spectra of complexes **1** and **3**, display rather high energy absorption bands, in the UV region, below 260 nm. These bands are ascribed to the d-d transitions and are typical of monoanionic gold complexes (P. Basu, A. Nigam, B. Mogesa, S. Denti, V.N. Nemykin, *Inorg. Chim. Acta* **2010**, 363, 2857).

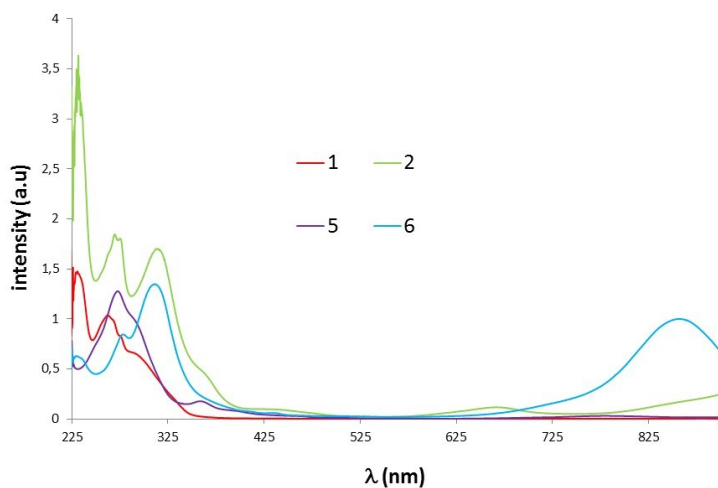

**Figure S11:** UV-Vis Spectra of compounds **1**, **2**, **5** and **6**.

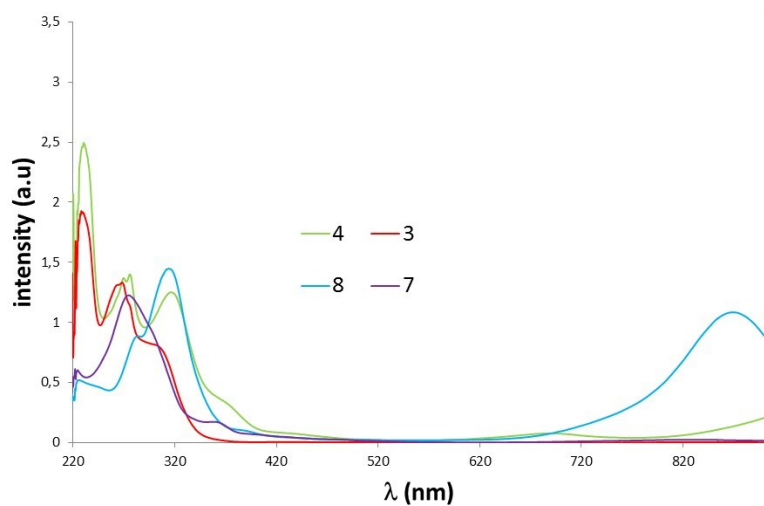

Figure S12: UV-Vis Spectra of compounds **3**, **4**, **7** and **8**.

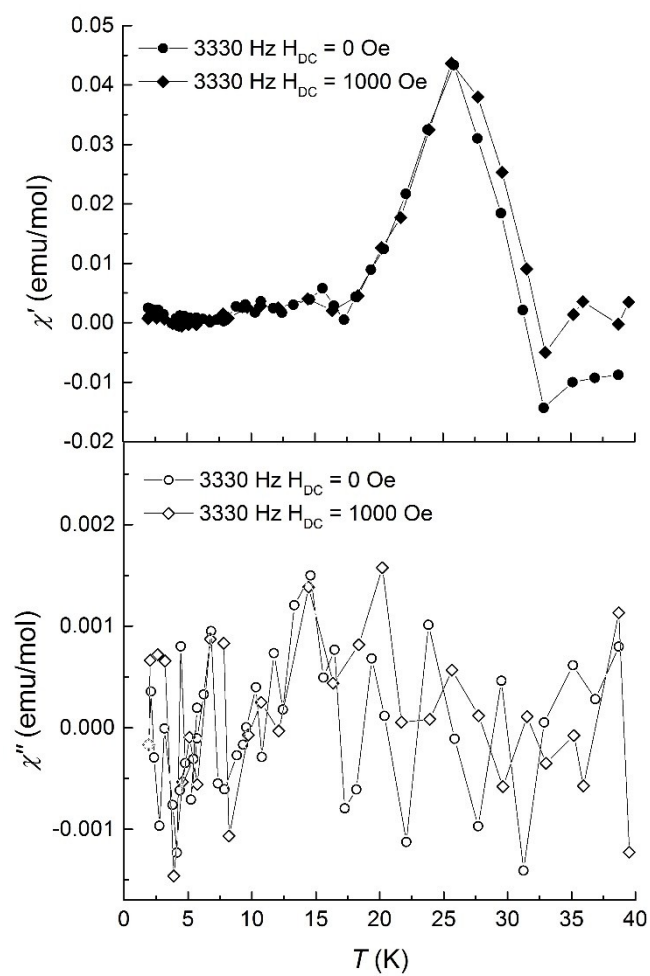

Figure S13: Temperature dependence of the real and imaginary components of AC susceptibility,  $\chi'$  and  $\chi''$ , of **7** at 3330 Hz under static magnetic fields of 0 and 1000 Oe.
